# Supplementary figures and images for: Screening, Diagnosis, and Initial Care of Asian and White Patients With Lung Cancer
Source: PubMed Central journal article supplement — Oncologist. 2023 Oct 5;29(4):332–41. doi: 10.1093/oncolo/oyad272 (PMC10994261; doi:10.1093/oncolo/oyad272), 2023-10-05

# Time to treatment initiation in all stages of lung cancer

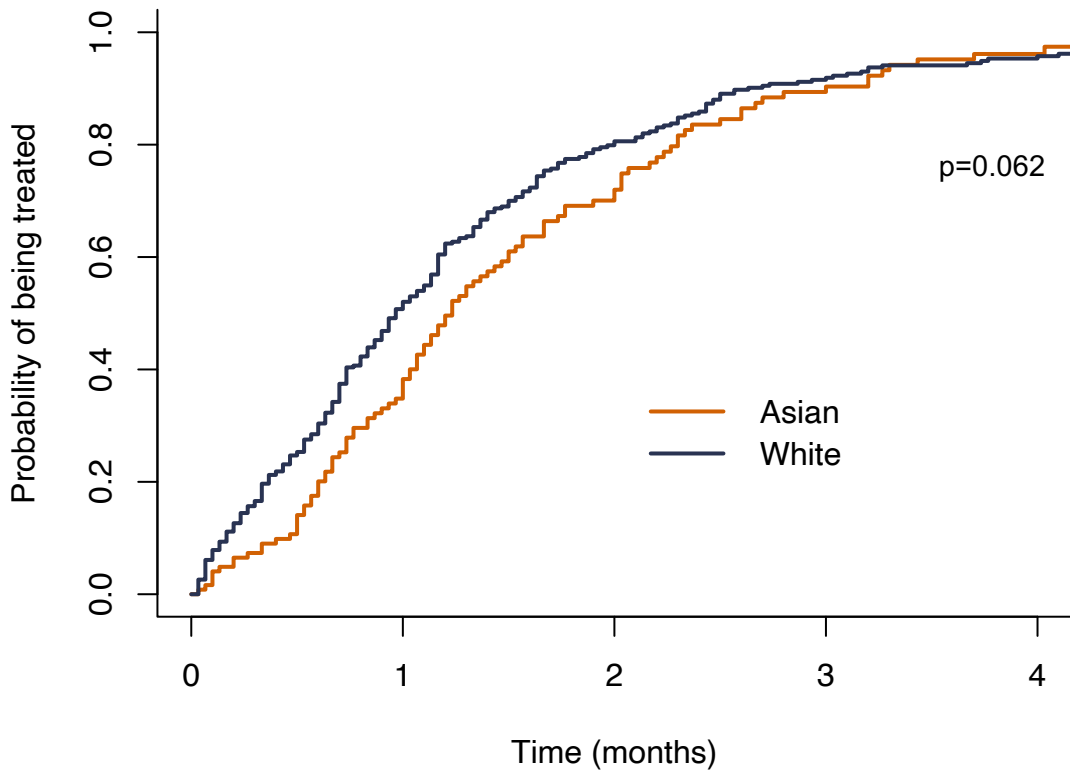

Supplement: oyad272_suppl_supplementary_figure_s1.pdf [file oyad272_suppl_supplementary_figure_s1.pdf]
